# Supplementary material
Source: publisher figshare collection journal article supplement (https://brill.figshare.com/articles/dataset/_/26977309)
Supplement: Supplementary file 1 [file 1]

## Sheet: sea_turtles_informations
ID_RC	Date	Sex	CCL	Weight	Latitude	Longitude	Location	Observation	Remark
CC.2015.02.01.039	2015-02-01	F	37	7	43.42008618	3.663597107	Sète	Bycatch
CC.2015.10.27.024	2015-10-27	F	53	18	42.789878	3.039127	Le Barcarès	Stranding
CC.2016.05.15.018	2016-05-15	M	47	12	43.515486	4.109003	Le Grau-du-Roi	Bycatch
CC.2016.06.28.030	2016-06-28	M	59	29.1	43.3180556	4.843611111	Port-Saint-Louis-du-Rhône	Bycatch
CC.2016.07.12.040	2016-07-12	M	31.5	4.4	43.3180556	4.843611111	Port-Saint-Louis-du-Rhône	Bycatch
CC.2016.08.08.048	2016-08-08	F	63	34	43.3480556	4.835	Port-Saint-Louis-du-Rhône	Bycatch
CC.2016.12.15.069	2016-12-15	F	46.5	11.4	43.51557	3.91113	Le Grau-du-Roi	Bycatch
CC.2017.05.25.012	2017-05-25	M	32.5	4.6	43.40548	4.58671	Arles	Bycatch
CC.2017.06.09.024	2017-06-09	M	39	6.8	43.328246	4.838218	Port-Saint-Louis-du-Rhône	Bycatch
CC.2017.06.10.027	2017-06-10	F	50	14.7	43.328246	4.838218	Port-Saint-Louis-du-Rhône	At sea
CC.2017.06.13.049	2017-06-13	U	54	14.6	43.27708	3.4425	Agde	Bycatch
CC.2017.06.14.032	2017-06-14	F	65	35.6	43.44185	4.56413	Arles	Bycatch
CC.2017.06.15.033	2017-06-15	F	59	27.7	43.33904	4.78077	Arles	Bycatch
CC.2017.08.03.045	2017-08-03	F	65.5	33.5	43.40825	4.9217	Fos-sur-mer	At sea	Dead at sea, injuries (propeller)
CC.2017.08.31.048	2017-08-31	M	35.5	5.4	43.212643	3.430873	Agde	Bycatch
CC.2017.10.16.052	2017-10-16	F	59	25.4	43.08666	3.10388	Gruissan	Stranding
CC.2018.04.25.005	2018-04-25	F	37	6.1	43.33088	5.040751	Martigues	Stranding
CC.2018.04.25.006	2018-04-25	F	45	10.5	43.404696	4.976857	Port-de-Bouc	Stranding
CC.2018.04.26.007	2018-04-26	F	63	31.7	43.532988	4.044436	Le Grau-du-Roi	Bycatch
CC.2018.04.27.009	2018-04-27	F	38	7.3	43.28083333	3.721111111	Agde	Bycatch
CC.2018.05.23.013	2018-05-23	F	37	6.1	43.364733	4.583601	Arles	Bycatch
CC.2018.05.25.014	2018-05-25	U	31	3.7	43.493296	3.862566	Villeneuve-lès-Maguelone	Stranding
CC.2018.06.12.018	2018-06-12	U	47	10.8	43.4411	4.5663	Saintes-Maries-de-la-Mer	Stranding	Severed tail
CC.2018.07.04.020	2018-07-04	F	37	5.9	43.503183	4.070082	Le Grau-du-Roi	Bycatch
CC.2018.10.16.023	2018-10-16	M	40	8	43.509396	4.048483	Le Grau-du-Roi	Bycatch
CC.2018.10.23.026	2018-10-23	F	32	4.5	43.305486	4.337346	Saintes-Maries-de-la-Mer	Bycatch
CC.2018.11.12.031	2018-11-12	M	34	4.8	43.299738	3.459001	Agde	Stranding
CC.2018.11.23.038	2018-11-23	F	45	11.4	43.3717889	4.036222222	Le Grau-du-Roi	Bycatch
CC.2018.11.26.039	2018-11-26	F	44	11.8	43.3500778	4.113552778	Le Grau-du-Roi	Bycatch
CC.2016.07.03.000	2016-07-03	F	73	56	43.181741	6.557095	Cavalaire-sur-Mer	Stranding	97 calcified eggs in oviducts, amputation right rear flipper, cracked carapace
CC.236	2018-10-07	U	4.5	0.0143	43.509317	3.890784	Villeneuve-lès-Maguelone	Dead hatchling	Dead hatchling from the nest of Villeneuve-lès-Maguelone found on 07/10/2018
CC.244	2018-10-07	U	4.2	0.0136	43.509317	3.890784	Villeneuve-lès-Maguelone	Dead hatchling	Dead hatchling from the nest of Villeneuve-lès-Maguelone found on 07/10/2018
CC.245	2018-10-07	U	4.6	0.0147	43.509317	3.890784	Villeneuve-lès-Maguelone	Dead hatchling	Dead hatchling from the nest of Villeneuve-lès-Maguelone found on 07/10/2018
CC.246	2018-10-07	U	4.4	0.0133	43.509317	3.890784	Villeneuve-lès-Maguelone	Dead hatchling	Dead hatchling from the nest of Villeneuve-lès-Maguelone found on 07/10/2018
CC.247	2018-10-07	U	4.2	0.0127	43.509317	3.890784	Villeneuve-lès-Maguelone	Dead hatchling	Dead hatchling from the nest of Villeneuve-lès-Maguelone found on 07/10/2018

## Sheet: humeri_morphometrics
ID_RC	Direction	ML	LL	PW	DpCW	MW	T	Mass
CC.2015.02.01.039	R	84.8	81.4	31	21.8	14.7	6.75	14.4
CC.2015.10.27.024	L	100.6	96.55	38.65	29.7	16.9	8.55	25.2
CC.2016.05.15.018	R	86.75	83.7	34.65	24.5	17.2	7.55	17.9
CC.2016.06.28.030	L	113.4	109.35	43.75	32.25	19.6	9.7	36.6
CC.2016.07.12.040	R	57.85	55	23.1	15.9	11.1	6.3	5.1
CC.2016.08.08.048	R	123.75	116.6	44.05	29.45	19.8	10.25	44.4
CC.2016.12.15.069	R	84.5	80.6	33.95	23.95	15.9	7.5	15.1
CC.2017.05.25.012	L	55.65	53.95	21.6	15.4	10.9	4.95	4.5
CC.2017.06.09.024	L	66.9	61.5	26.6	18.1	13.05	6.1	7.8
CC.2017.06.10.027	R	87.7	86.2	33.4	23.25	16.05	7.7	17.7
CC.2017.06.13.049	R	99.05	96.2	38.65	25.65	18	8.3	27.9
CC.2017.06.14.032	R	117.25	113.6	41.85	31.15	21.15	9.55	42.5
CC.2017.06.15.033	L	109.75	102.3	42.85	28.65	20.75	9.75	39.7
CC.2017.08.03.045	R	122.3	120.8	47.65	33.3	21.15	10.4	48.2
CC.2017.08.31.048	R	65.7	64.9	25.8	17.1	11.85	5.7	7.3
CC.2017.10.16.052	L	108.2	100.45	40.7	26.05	18.85	8.7	29.1
CC.2018.04.25.005	R	70.75	68.05	25.65	18.45	12.65	6.25	8.3
CC.2018.04.25.006	L	92.8	90.1	35.9	24.75	16.55	7.55	19.1
CC.2018.04.26.007	L	117.35	109.65	44.7	29.15	20.6	9.35	38.6
CC.2018.04.27.009	R	66.5	64.35	25.45	17.4	12.5	6.85	7.4
CC.2018.05.23.013	R	66.2	63.8	25.05	18.5	12.45	5.9	7
CC.2018.05.25.014	L	57.25	54.35	23.1	16.4	10.95	5.15	4.7
CC.2018.06.12.018	L	67.6	63.7	27	22.2	12.9	6.15	8.2
CC.2018.07.04.020	L	64.9	63.1	24.5	21.8	12.2	6.65	7.2
CC.2018.10.16.023	L	87.45	83.15	33.45	23.2	14.3	6.6	13.8
CC.2018.10.23.026	L	55.7	52.85	20.6	13.9	10.1	5.05	3.9
CC.2018.11.12.031	R	54.75	51.45	23.5	20.6	11.6	5.35	5.1
CC.2018.11.23.038	L	74.85	70.3	31.2	23.4	14.5	6.9	11.8
CC.2018.11.26.039	R	75.6	73.6	32.2	20.2	14.8	6.45	12.2
CC.2016.07.03.000	L	144.6	137.45	58.75	40.1	26.5	12.45	88.7
CC.236	L	10.1
CC.244	L	10.3
CC.245	R	10.4
CC.246	L	10.6
CC.247	R	10.4

## Sheet: LAG_per_turtle
ID_RC	Core_incomplete_LAG	Complete_LAG	Peripheral_incomplete_LAG	Supplementary_seasonal_LAG	Total_observed_LAG
CC.2015.02.01.039	0	9	0	1	10
CC.2015.10.27.024	1	6	0	0	7
CC.2016.05.15.018	0	5	0	1	6
CC.2016.06.28.030	2	8	0	0	10
CC.2016.07.12.040	0	3	0	0	3
CC.2016.08.08.048	2	6	0	0	8
CC.2016.12.15.069	0	5	0	0	5
CC.2017.05.25.012	0	3	0	1	4
CC.2017.06.09.024	0	4	0	1	5
CC.2017.06.10.027	1	5	0	0	6
CC.2017.06.13.049	1	5	0	1	7
CC.2017.06.14.032	1	6	0	1	8
CC.2017.06.15.033	4	4	0	1	9
CC.2017.08.03.045	3	6	0	0	9
CC.2017.08.31.048	0	4	0	0	4
CC.2017.10.16.052	2	5	0	0	7
CC.2018.04.25.005	0	7	0	1	8
CC.2018.04.25.006	2	6	0	1	9
CC.2018.04.26.007	2	4	0	1	7
CC.2018.04.27.009	1	3	0	1	5
CC.2018.05.23.013	0	3	0	1	4
CC.2018.05.25.014	1	2	0	1	4
CC.2018.06.12.018	0	4	0	1	5
CC.2018.07.04.020	1	3	0	0	4
CC.2018.10.16.023	0	5	0	0	5
CC.2018.10.23.026	0	3	0	0	3
CC.2018.11.12.031	0	3	1	0	4
CC.2018.11.23.038	0	3	1	0	4
CC.2018.11.26.039	1	4	0	0	5
CC.2016.07.03.000	2	11	0	0	13
CC.236	0	0	0	0	0
CC.244	0	0	0	0	0
CC.245	0	0	0	0	0
CC.246	0	0	0	0	0
CC.247	0	0	0	0	0

## Sheet: LAG_measurements
ID_RC	AH	AER	LAG1	LAG2	LAG3	LAG4	LAG5	LAG6	LAG7	LAG8	LAG9	LAG10	LAG11
CC.2015.02.01.039	100553384	26946874	27589764	35966752	41682820	48171528	52984480	66554420	73990472	80772440	87718912
CC.2015.10.27.024	128851816	49118400	57706204	63379356	73758144	87765544	104722480	119800624
CC.2016.05.15.018	130310280	31292706	33134902	42615408	60296716	68926544	95999008
CC.2016.06.28.030	170405968	58377772	71063584	78155232	86427144	98296656	109452864	119900880	131179616	151571680
CC.2016.07.12.040	54197088	13439889	16735698	28365050	40833872
CC.2016.08.08.048	176134512	61201532	82103896	103886440	126468592	146933744	161358896	170124240
CC.2016.12.15.069	120355968	36245400	38020184	45600668	58796408	77601952	99476032
CC.2017.05.25.012	51021812	13202478	12867467	23097746	35803332
CC.2017.06.09.024	69241656	22423506	23690036	31728130	41590876	51723956
CC.2017.06.10.027	106067056	38100980	46694720	56203040	69711232	80930664	95863320
CC.2017.06.13.049	147077360	38738664	52800752	60340072	79002024	103998744	130788040
CC.2017.06.14.032	206077120	79790240	86840696	107374520	127249920	142353472	161858896	184716560
CC.2017.06.15.033	173936608	80178336	99182800	114261344	137589408	158290912
CC.2017.08.03.045	178049424	53353408	72636832	85214144	102901304	122691624	143397264	166424304
CC.2017.08.31.048	69104456	28099994	32976242	40026968	51594848	62540744
CC.2017.10.16.052	166509008	41386580	74001488	86564096	104801344	128851968	153787408
CC.2018.04.25.005	77594784	26294252	26642460	37001288	46594212	52729740	58322144	63040668	69666968
CC.2018.04.25.006	97467704	37773876	41149524	48361984	55553316	64655040	81015752	87497736
CC.2018.04.26.007	190977520	71060176	94768840	123504168	148859808	170645456
CC.2018.04.27.009	72519512	18673472	25161710	43634328	57473748
CC.2018.05.23.013	69322304	25230940	31244122	40383124	51891288
CC.2018.05.25.014	44779628	18925292	21932820	34502248
CC.2018.06.12.018	74660024	17494048	24678376	36581612	40618388	58020592
CC.2018.07.04.020	69547552	20299730	26074380	36066192	49451992
CC.2018.10.16.023	86136536	24378064	32051806	45261124	57446980	66333488	72162616
CC.2018.10.23.026	47968416	14476980	15024542	24409278	34298716
CC.2018.11.12.031	63109632	11772574	13089749	22583136	36846096
CC.2018.11.23.038	81791664	28705914	40086112	55592264	69272064
CC.2018.11.26.039	88267808	16367741	21559950	36881908	43666840	61042360
CC.2016.07.03.000	310468704	111403944	160834480	182023824	204095808	221837184	237365744	250418224	258433312	268639232	279927584	290822496	302255648
CC.236	1389346
CC.244	1551032
CC.245	1640818
CC.246	1407843
CC.247	1491527
