# Supplementary material
Source: publisher figshare collection journal article supplement (https://brill.figshare.com/articles/dataset/_/26977309)
Supplement: Supplementary file 1 [file 1]

Age and growth rate estimated by skeletochronology in  
loggerhead sea turtles from French Mediterranean waters

Dimitri Medetian<sup>\*</sup>, Claude Miaud

CEFE, Univ Montpellier, CNRS, EPHE-PSL University (Biogéographie et Écologie des  
Vertébrés), IRD, Univ Paul Valéry Montpellier 3, 34293 Montpellier, France

<sup>\*</sup>Corresponding author; email: [dimitri.medetian@gmail.com](mailto:dimitri.medetian@gmail.com)

**Supplementary material**

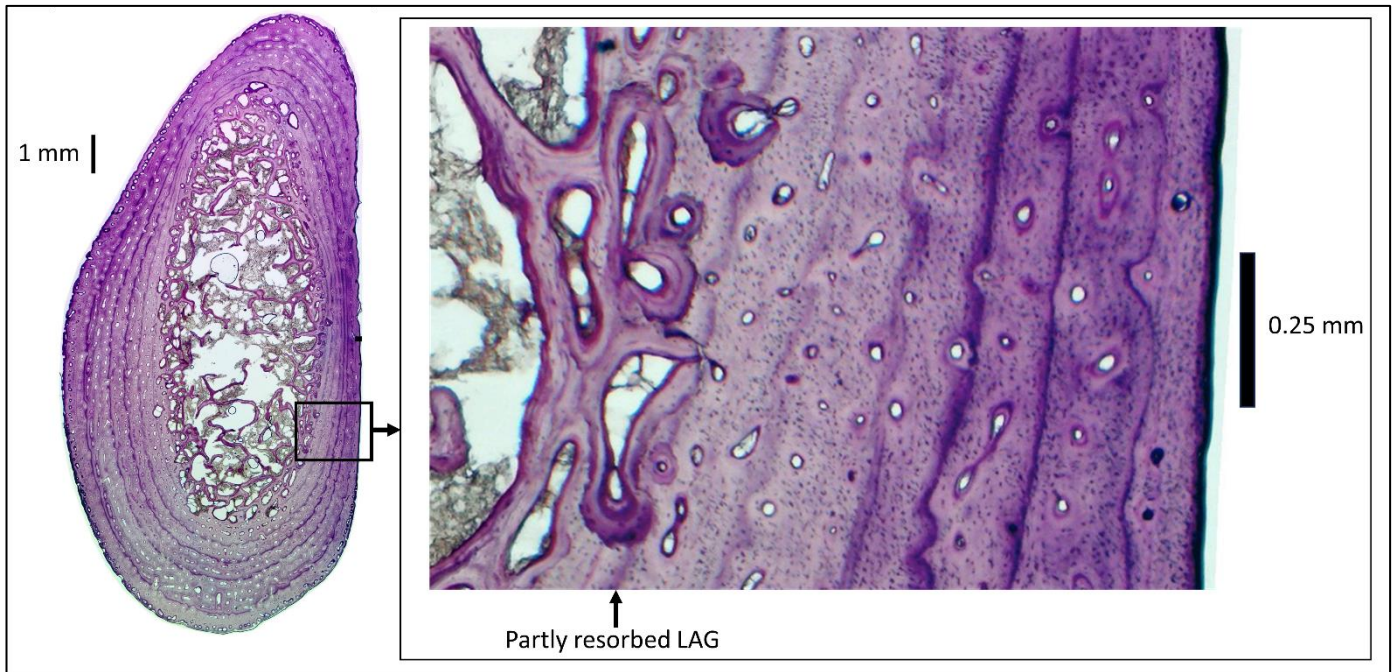

**Figure S1.** Partly resorbed Line of Arrested Growth (LAG) (Individual: CC.2018.04.25.006).

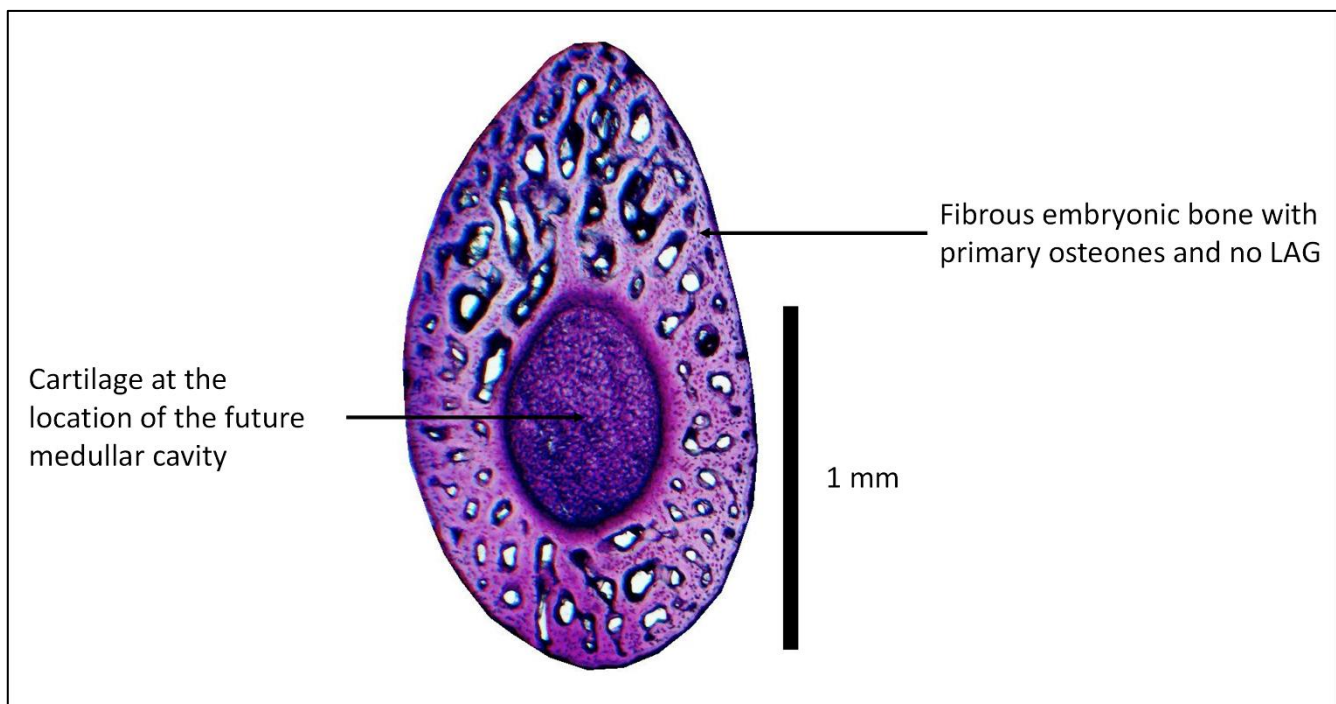

**Figure S2.** Hatchling humerus section in the diaphysis part (Individual: CC.246).

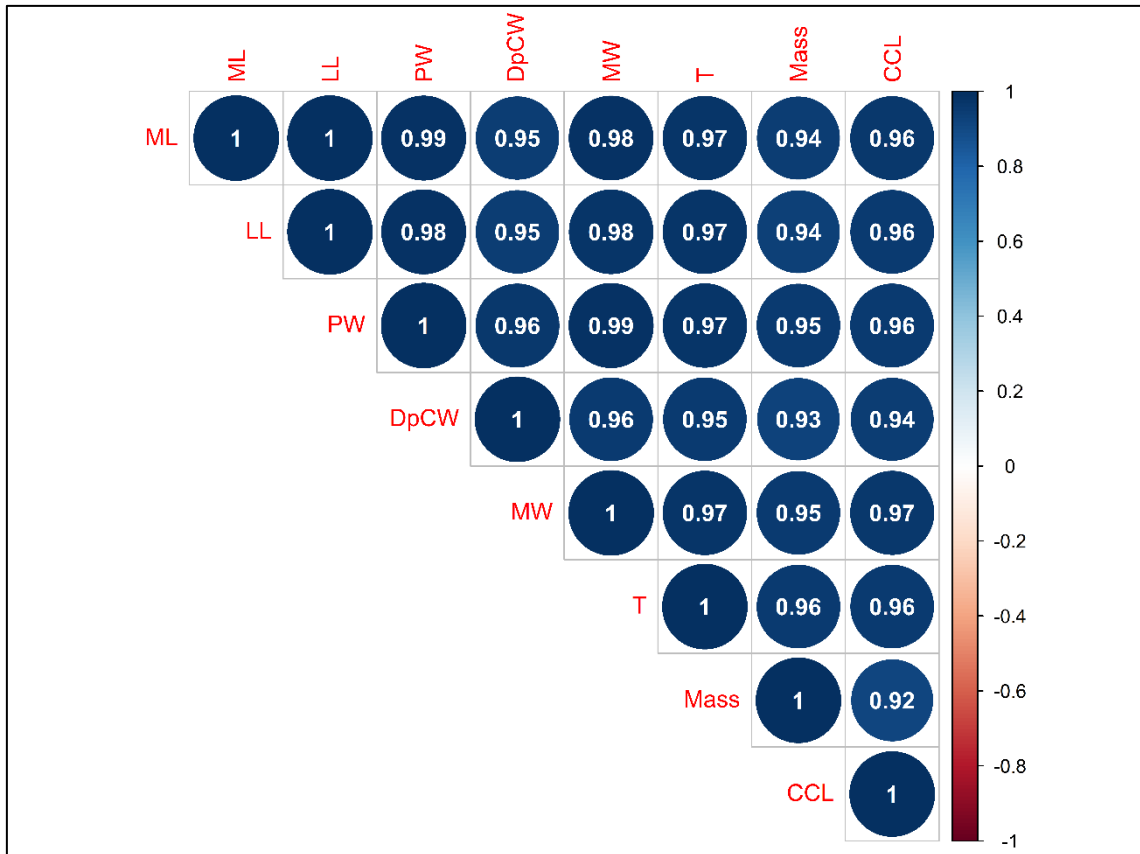

**Figure S3.** Correlation matrix showing the allometry between humeri morphometric measurements and Curved Carapace Length (Spearman rank test).

Measurements were taken (to the nearest 0.05 mm) on humeri using callipers according to Zug, Wynn and Ruckdeschel, 1986: (1) ML: maximum length, distance from proximal-most tip of ulnar process to distal articular surface; (2) LL: longitudinal length, distance from proximal surface of head to distal articular surface, parallel to longitudinal axis of humerus; (3) PW: proximal width, distance from preaxial surface of head to postaxial surface of ulnar process, perpendicular to longitudinal axis; (4) DpCW: width at deltopectoral crest, transverse distance of shaft from pre- to postaxial surfaces at deltopectoral crest; (5) MW: medial width, transverse distance from pre- to postaxial

surfaces at point of minimum width; (6) T: thickness, minimum depth in middle of shaft, approximately in vicinity of MW, perpendicular to longitudinal and transverse axes.

## **Reference**

Zug, G.R., Wynn, A.H., Ruckdeschel, C. (1986): Age determination of loggerhead sea turtles, *Caretta caretta*, by incremental growth marks in the skeleton. *Smiths. Contrib. Zool.* **427**: 1-34.
